# Supplementary material
Source: ML conference proceedings conference paper supplement (https://openreview.net/forum?id=5K3VeoBnqc)
Supplement: supplementary_material [file attachment]

Dear Reviewers,

We sincerely appreciate your time and dedication to reviewing our work.

This PDF summarizes all supplementary materials of our submission to help you quickly search for the contents you may be interested in.

**Our supplementary materials include:**

- An appendix located after the reference in the main PDF file.
- A demo video for the time accuracy experiment.
- A folder containing visualizations of learned embeddings from different AED methods.

**Regarding the source code and dataset:**

It's challenging to provide them during the submission because the size of the dataset exceeds 1T. We will open-source them once our work is accepted. Moreover, we would be happy to provide evaluation-only code for a small experiment if reviewers require it.

**Appendix's catalog (contents in the main PDF):**

- Section A: Few-shot imitation (FSI) policies' details (page 13)
- Section B: Our proposed PrObe's details (page 13-15)
- Section C: AED baselines' details (page 15-16)
- Section D: Our designed FSI tasks (page 16-18)
- Section E: Ablation study and error correction (page 19-23, 25)
  - Rollout augmentation
  - Component contribution
  - Performance stability (error bar)
  - Failure prediction case
  - Demonstration quality
  - Viewpoint changes
  - Error correction
- Section F: limitation (page 24)
- Broader Impact (page 24)

If there are any experiments you believe are worth exploring, or methods that fit our AED task and are worthy of comparison, please let us know. We would love to check and verify them.

We look forward to learning from you during our discussion!

Sincerely,

The authors of submission 1466
